# Supplementary material for: Exploiting MoSi2N4, WSi2N4 and WGe2N4 monolayers for efficient photocatalytic overall water splitting across a broad pH range
Source: Royal Society of Chemistry journal article supplement (doi:10.1039/d4nj01105h), 2024-01-01
Supplement: d4nj01105h1.pdf [file d4nj01105h1.pdf]

## **Electronic Supplementary Material (ESI) for**

# **Exploiting monolayer MoSi<sub>2</sub>N<sub>4</sub>, WSi<sub>2</sub>N<sub>4</sub> and WGe<sub>2</sub>N<sub>4</sub> for efficient photocatalytic overall water splitting across a broad pH range**

Xuhui Yang<sup>\*1,2</sup>, Hang Xue<sup>1</sup>, Luteng Luo<sup>1</sup>

<sup>1</sup>College of Environmental and Resource Sciences, College of Carbon Neutral Modern Industry,  
Fujian Key Laboratory of Pollution Control & Resource Reuse, Fujian Normal University,  
Fuzhou 350007, P.R. China

<sup>2</sup>State Key Laboratory of Photocatalysis on Energy and Environment, Fuzhou University,  
Fuzhou, 350116, P. R. China

*\*To whom correspondence should be addressed*

E-mail: xhyang@fjnu.edu.cn

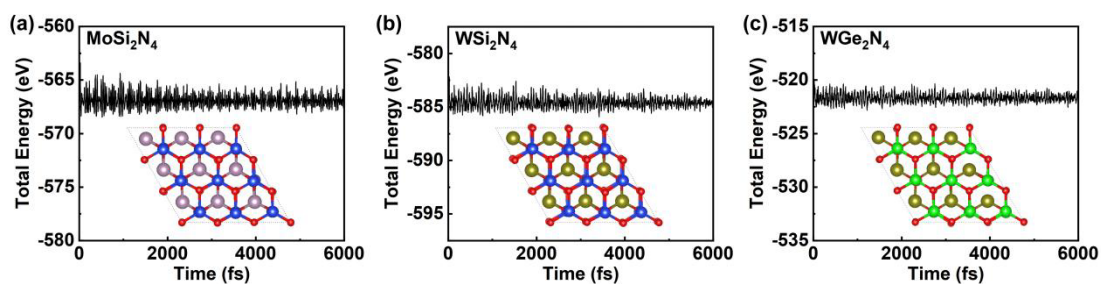

Fig. S1 AIMD of  $\text{MoSi}_2\text{N}_4$ ,  $\text{WSi}_2\text{N}_4$ , and  $\text{WGe}_2\text{N}_4$

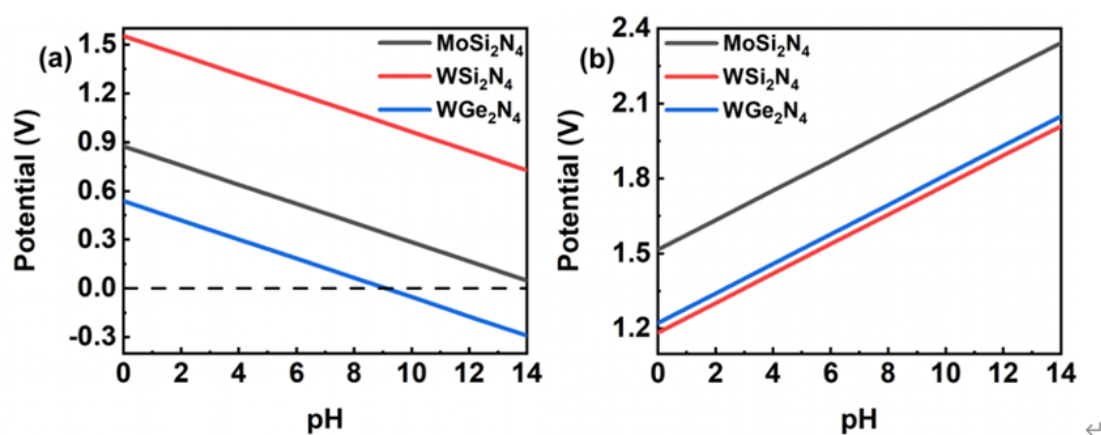

Fig. S2 The external potentials of (a)  $U_e$  and (b)  $U_h$  provided by  $\text{MoSi}_2\text{N}_4$ ,  $\text{WSi}_2\text{N}_4$ , and  $\text{WGe}_2\text{N}_4$ , respectively, where the negative value indicates that there is no photocatalytic activity.

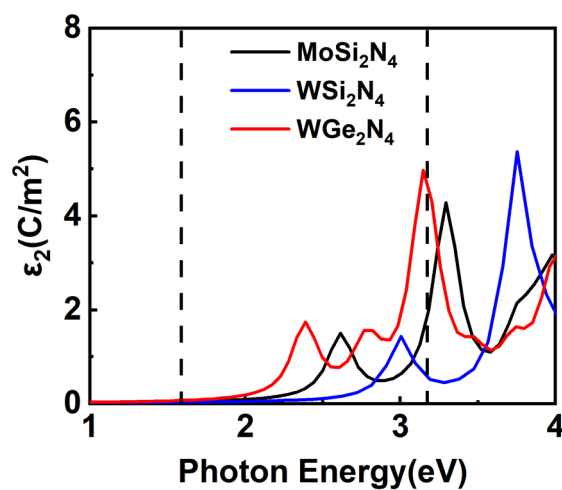

Fig. S3 Calculated imaginary part of dielectric function of  $\text{MoSi}_2\text{N}_4$ ,  $\text{WSi}_2\text{N}_4$ , and  $\text{WGe}_2\text{N}_4$  using HSE06.

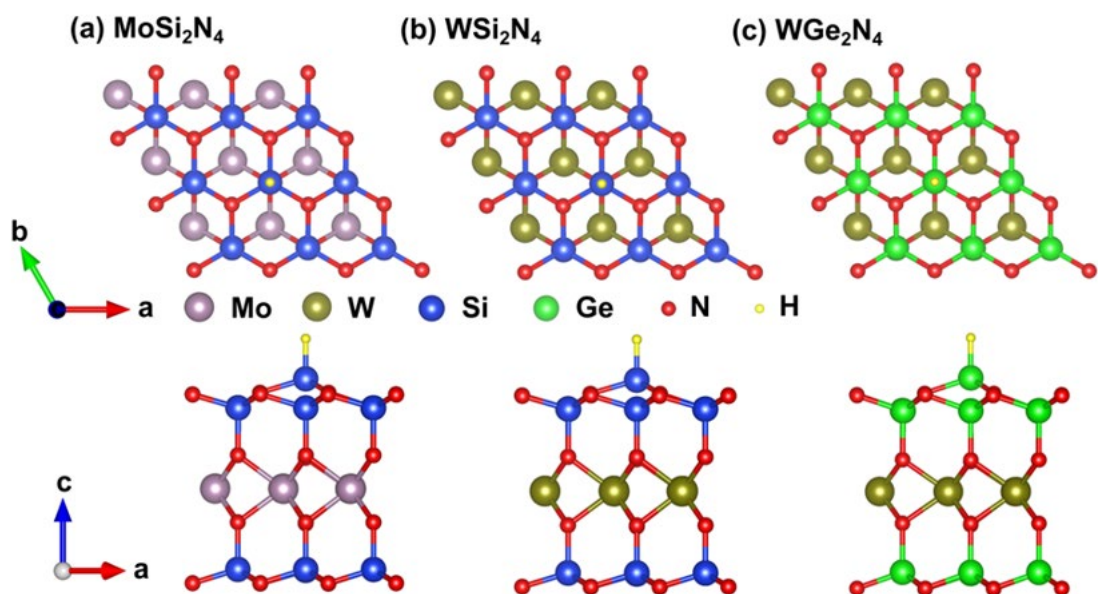

Fig. S4 The top and side view of (a)  $\text{MoSi}_2\text{N}_4$ , (b)  $\text{WSi}_2\text{N}_4$  and (c)  $\text{WGe}_2\text{N}_4$  of hydrogen atom adsorption, respectively.

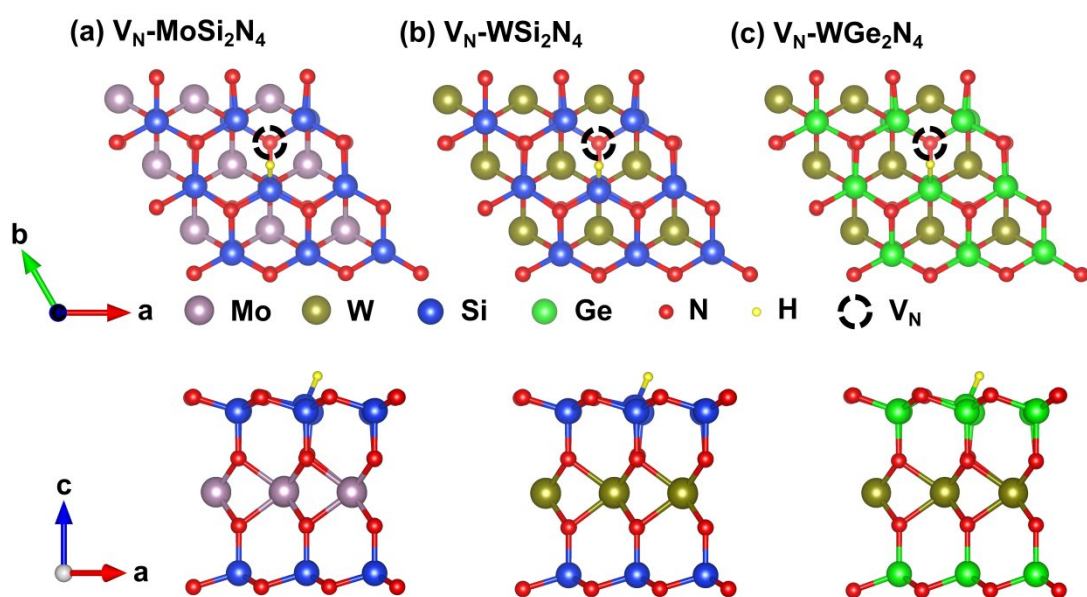

Fig. S5 The top and side view of (a)  $\text{V}_\text{N}$ - $\text{MoSi}_2\text{N}_4$ , (b)  $\text{V}_\text{N}$ - $\text{WSi}_2\text{N}_4$  and (c)  $\text{V}_\text{N}$ - $\text{WGe}_2\text{N}_4$  of hydrogen atom adsorption, respectively.

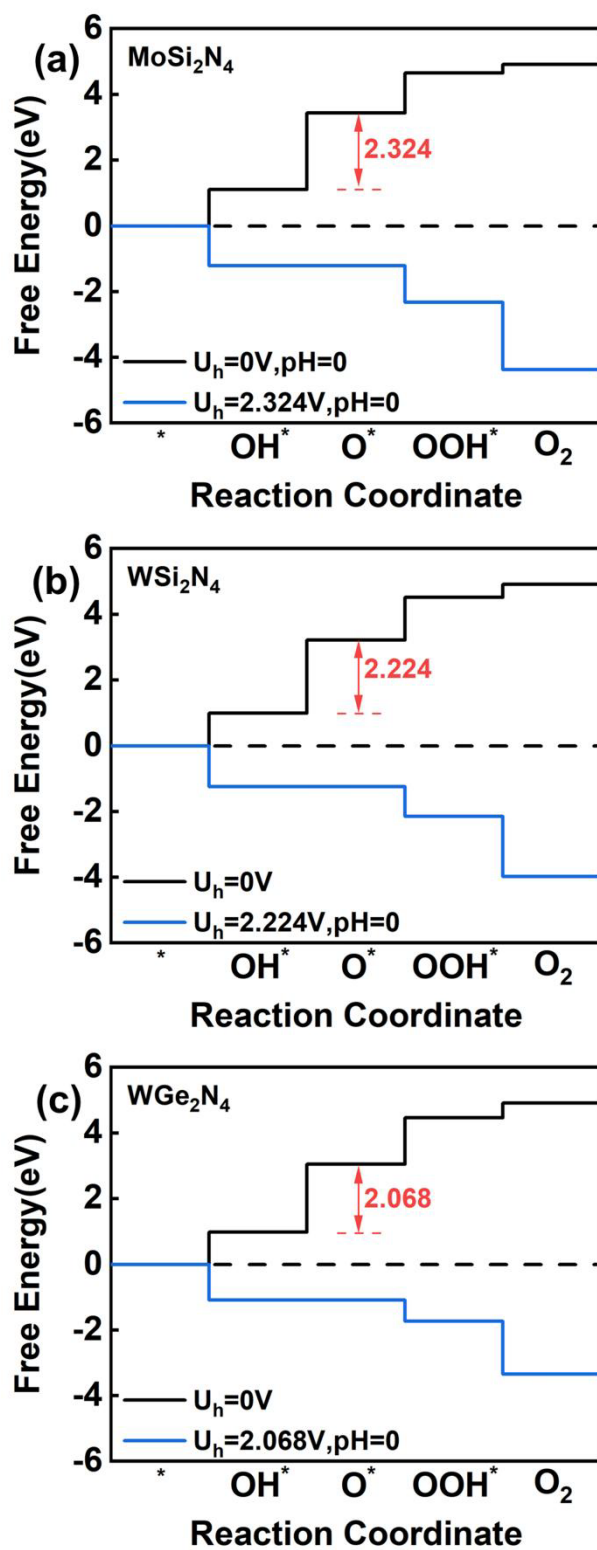

Fig. S6 The free energy for OER on the surface of (a)  $\text{MoSi}_2\text{N}_4$ , (b)  $\text{WSi}_2\text{N}_4$ , and (c)  $\text{WGe}_2\text{N}_4$ , respectively.

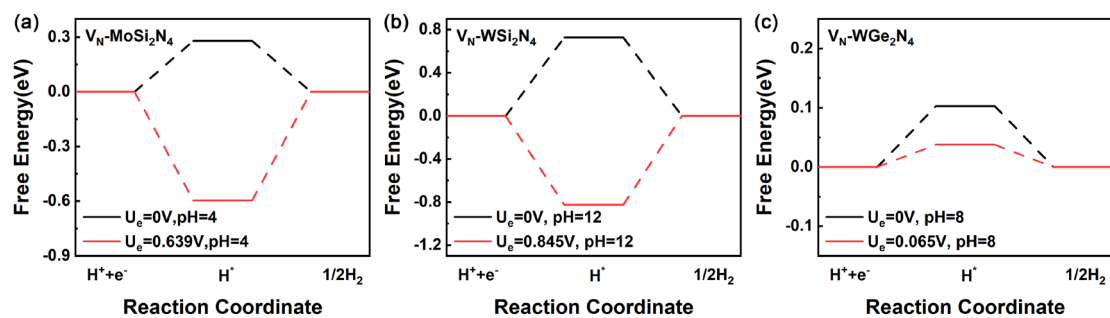

Fig. S7 The free energy for HER in (a)  $MoSi_2N_4$ , (b)  $WSi_2N_4$ , and (c)  $WGe_2N_4$  with considering the N vacancy defects. Black line corresponds the conditions absent of light irradiation at pH = 4, 12, and 8, the red line denotes the provision of light at pH = 4, 12, and 8 for  $MoSi_2N_4$ ,  $WSi_2N_4$ , and  $WGe_2N_4$  respectively.
